# Supplementary material for: Clinical impact of the two ART resistance markers, K13 gene mutations and DPC3 in Vietnam
Source: PubMed Central journal article supplement (PMC6445423; doi:10.1371/journal.pone.0214667), 2019-04-02
Supplement: pone.0214667.s001.pdf [file pone.0214667.s001.pdf]

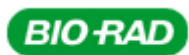

# pasmepsin2 amplification HUONG HOA PATIENT.pcrd

07/02/2019 15:04

## Report Information

User: BioRad/admin

Data File Name: pasmepsin2 amplification HUONG HOA PATIENT.pcrd

Data File Path: C:\Users\Maria Carmina Pau\Desktop\PAPER 19 ALLEGATI\supplementary data

Well Group Name: Group 1

Report Differs from Last Save: No

## Run Setup

### Run Information

Run Date: 06/05/2017 21:59

Run User:

Run Type: User-defined

Plate File: DefaultPlate.pltd

ID:

Notes:

Sample Volume: 20

Temperature Control Mode: Calculated

Lid Temperature: 105

Base Serial Number: CT004529

Optical Head Serial Number: 785BR8775

### Protocol

1: 50,0°C for 2:00

2: 95,0°C for 10:00

3: 95,0°C for 0:15

4: 60,0°C for 0:30

5: 60,0°C for 0:30

Plate Read

6: GOTO 3, 40 more times

### Plate Display

|   | 1                    | 2                      | 3                    | 4                      | 5                    | 6                      | 7                               | 8                             | 9 | 10 | 11 | 12 |
|---|----------------------|------------------------|----------------------|------------------------|----------------------|------------------------|---------------------------------|-------------------------------|---|----|----|----|
| A | Unk<br>PM2<br>NT001  | Unk<br>B TUB<br>NT001  | Unk<br>PM2<br>VAS03A | Unk<br>B TUB<br>VAS03A | Unk<br>PM2<br>VCQ 03 | Unk<br>B TUB<br>VCQ 03 | Unk<br>PM2<br>X29               | Unk<br>B TUB<br>X29           |   |    |    |    |
| B | Unk<br>PM2<br>NT 002 | Unk<br>B TUB<br>NT 002 | Unk<br>PM2<br>VCQ05  | Unk<br>B TUB<br>VCQ05  | Unk<br>PM2<br>VCQ02  | Unk<br>B TUB<br>VCQ02  | Unk<br>PM2<br>T25               | Unk<br>B TUB<br>T25           |   |    |    |    |
| C | Unk<br>PM2<br>NT 004 | Unk<br>B TUB<br>NT 004 | Unk<br>PM2<br>VCQ06  | Unk<br>B TUB<br>VCQ06  | Unk<br>PM2<br>VAL04  | Unk<br>B TUB<br>VAL04  | Unk<br>PM2<br>X43               | Unk<br>B TUB<br>X43           |   |    |    |    |
| D | Unk<br>PM2<br>NT007  | Unk<br>B TUB<br>NT007  | Unk<br>PM2<br>VCQ07  | Unk<br>B TUB<br>VCQ07  | Unk<br>PM2<br>VCQ03H | Unk<br>B TUB<br>VCQ03H | Unk<br>B TUB<br>huong hoa<br>30 | Unk<br>PM2<br>huong hoa<br>30 |   |    |    |    |

## Plate Display

|   |                      |                        |                     |                       |                     |                       |                   |                     |   |    |    |    |
|---|----------------------|------------------------|---------------------|-----------------------|---------------------|-----------------------|-------------------|---------------------|---|----|----|----|
|   | 1                    | 2                      | 3                   | 4                     | 5                   | 6                     | 7                 | 8                   | 9 | 10 | 11 | 12 |
| E | Unk<br>PM2<br>NT08   | Unk<br>B TUB<br>NT08   | Unk<br>PM2<br>VAS04 | Unk<br>B TUB<br>VAS04 | Unk<br>PM2<br>VCQ08 | Unk<br>B TUB<br>VCQ08 | Unk<br>PM2<br>X18 | Unk<br>B TUB<br>X18 |   |    |    |    |
| F | Unk<br>PM2<br>NT 10  | Unk<br>B TUB<br>NT 10  | Unk<br>PM2<br>VAL3C | Unk<br>B TUB<br>VAL3C | Unk<br>PM2<br>VCQ07 | Unk<br>B TUB<br>VCQ07 | Unk<br>PM2<br>X28 | Unk<br>B TUB<br>X28 |   |    |    |    |
| G | Unk<br>PM2<br>VCQ 04 | Unk<br>B TUB<br>VCQ 04 | Unk<br>PM2<br>VAS05 | Unk<br>B TUB<br>VAS05 | Unk<br>PM2<br>X44   | Unk<br>B TUB<br>X44   | Unk<br>PM2<br>X4  | Unk<br>B TUB<br>X4  |   |    |    |    |
| H | Unk<br>PM2<br>B10    | Unk<br>B TUB<br>B10    | Unk<br>PM2<br>B13   | Unk<br>B TUB<br>B13   | Unk<br>PM2<br>BT20  | Unk<br>B TUB<br>BT20  | Unk<br>PM2<br>B12 | Unk<br>B TUB<br>B12 |   |    |    |    |

## Quantification

Step #: 5

Analysis Mode: Fluorophore

Cq Determination: Single Threshold

Baseline Method:

SYBR: Auto Calculated

Threshold Setting:

SYBR: 310,60, User Defined

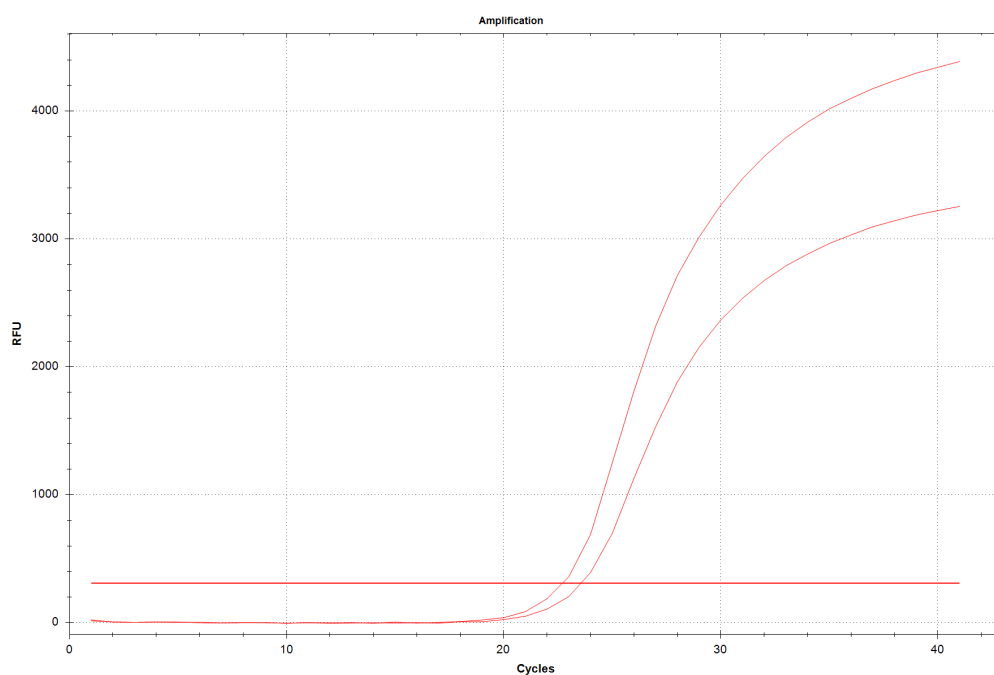

## Quantification Data

| Well | Fluor | Target | Content | Sample          | Cq    | Cq Mean | Cq Std. Dev |
|------|-------|--------|---------|-----------------|-------|---------|-------------|
| D07  | SYBR  | B TUB  | Unkn    | huong<br>hoa 30 | 23,56 | 23,56   | 0,000       |
| D08  | SYBR  | PM2    | Unkn    | huong<br>hoa 30 | 22,71 | 22,71   | 0,000       |

## Bar Chart

Expression analysis is not possible, wells must contain at least two samples with target(s), which have a valid Cq.

## Target Names

| Name  | Full Name | Reference | Auto Efficiency | Efficiency |
|-------|-----------|-----------|-----------------|------------|
| B TUB | B TUB     | False     | Yes             | 100,0%     |
| PM2   | PM2       | False     | Yes             | 100,0%     |

## Sample Names

| Name         | Full Name    | Control |
|--------------|--------------|---------|
| huong hoa 30 | huong hoa 30 | Yes     |

## Gene Expression - Bar Chart Data

| Target | Sample       | Ctrl | Relative Quantity | Relative Quantity SEM | Corrected Relative Quantity SEM | Mean Cq | Cq SEM  |
|--------|--------------|------|-------------------|-----------------------|---------------------------------|---------|---------|
| B TUB  | huong hoa 30 |      | 0,00000           | N/A                   | N/A                             | 23,56   | 0,00000 |
| PM2    | huong hoa 30 |      | 0,00000           | N/A                   | N/A                             | 22,71   | 0,00000 |

## QC Parameters

### Data

| Description                             | Value | Use  | Results | Exclude Wells | All excluded wells |
|-----------------------------------------|-------|------|---------|---------------|--------------------|
| Negative control with a Cq less than    | 38    | True |         | False         |                    |
| NTC with a Cq less than                 | 38    | True |         | False         |                    |
| NRT with a Cq less than                 | 38    | True |         | False         |                    |
| Positive control with a Cq greater than | 30    | True |         | False         |                    |
| Unknown without a Cq                    | N/A   | True |         | False         |                    |
| Standard without a Cq                   | N/A   | True |         | False         |                    |
| Efficiency greater than                 | 110,0 | True |         |               |                    |
| Efficiency less than                    | 90,0  | True |         |               |                    |
| Std Curve R <sup>2</sup> less than      | 0,980 | True |         |               |                    |

## Data

| <b>Description</b>                      | <b>Value</b> | <b>Use</b> | <b>Results</b> | <b>Exclude Wells</b> | <b>All excluded wells</b> |
|-----------------------------------------|--------------|------------|----------------|----------------------|---------------------------|
| Replicate group Cq Std Dev greater than | 0,20         | True       |                | False                |                           |
